# Supplementary material
Source: Springer Nature journal article supplement (https://www.springermedizin.de/resource/supplementary/12889_2012_4105_MOESM2_ESM.pdf/9491254)

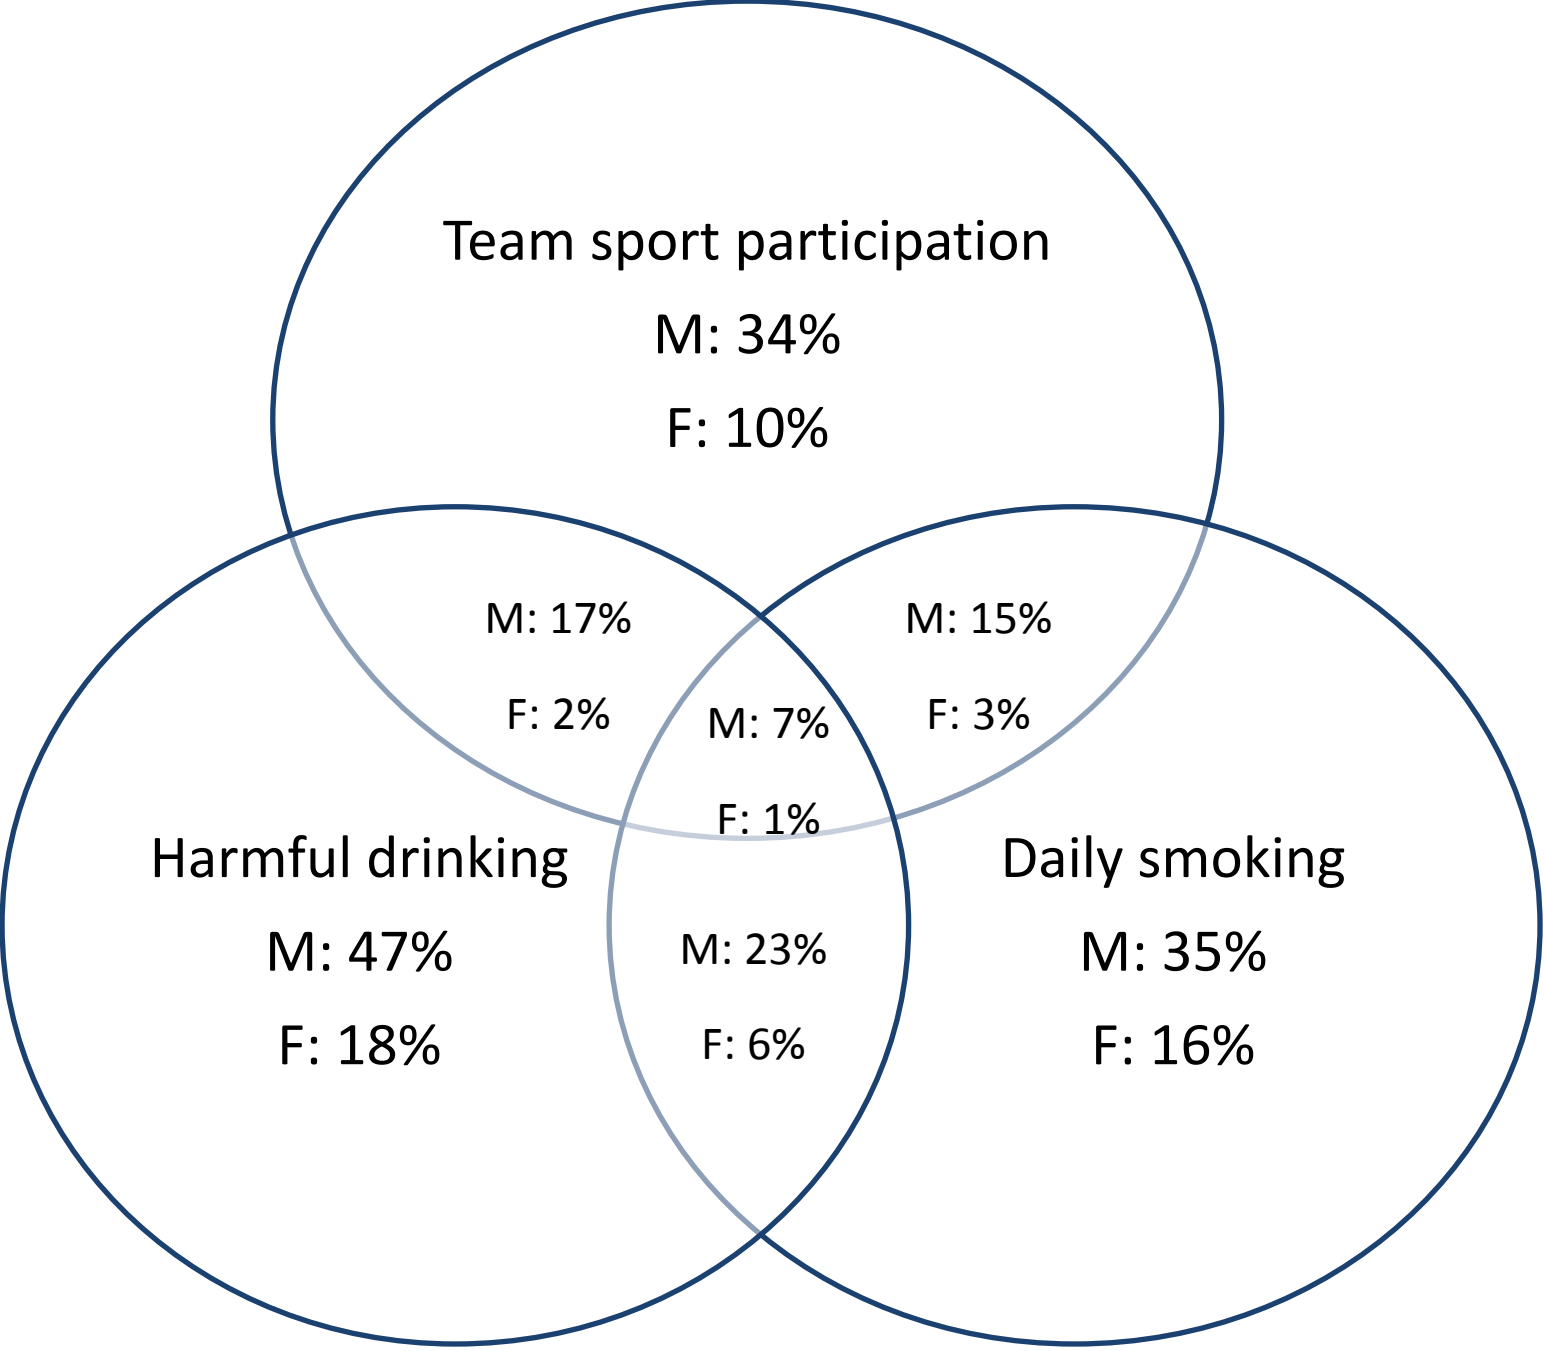

Team sport participation

M: 34%

F: 10%

M: 17%

F: 2%

M: 15%

F: 3%

M: 7%

F: 1%

Harmful drinking

M: 47%

F: 18%

Daily smoking

M: 35%

F: 16%

M: 23%

F: 6%

Supplement: MOESM2 [file 9491254]
